# Supplementary material for: Application of an O-Linked Glycosylation System in Yersinia enterocolitica Serotype O:9 to Generate a New Candidate Vaccine against Brucella abortus
Source: MDPI journal article supplement (doi:10.3390/microorganisms8030436), 2020-03-20
Supplement: s1 [file s1]

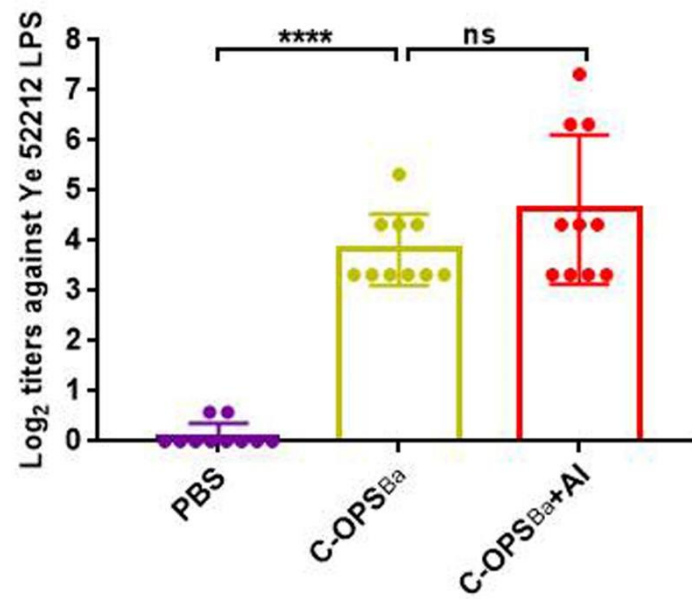

**Figure S3.** IgG responses against YeO9\_52212 LPS. IgG titres against 52212 LPS were measured in the sera of PBS-, C-OPS<sub>Ba</sub>- and C-OPS<sub>Ba</sub>+Al-vaccinated mice after three immunizations. Each value represents the mean  $\pm$  standard deviation of log<sub>2</sub>-transformed titres in the sera of individual mice (shown as points) from each group. The unpaired t-test was used to evaluate differences between IgG titres (\*\*\*\*,  $P < 0.0001$ ; ns, no statistically significant difference).
