# Supplementary material for: Application of an O-Linked Glycosylation System in Yersinia enterocolitica Serotype O:9 to Generate a New Candidate Vaccine against Brucella abortus
Source: MDPI journal article supplement (doi:10.3390/microorganisms8030436), 2020-03-20
Supplement: s1 [file s1]

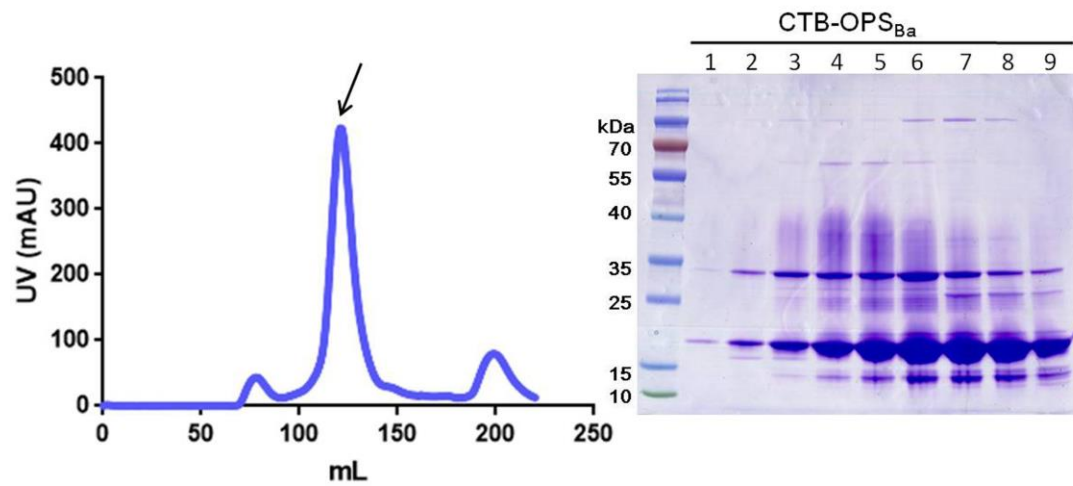

**Figure S1.** Purification of CTB-OPS<sub>Ba</sub>. Left: Size exclusion chromatography of CTB-OPS<sub>Ba</sub>. The black arrow represents the target glycoprotein peak. Right: Nine collected fractions were analysed by Coomassie Blue staining, then fractions 3-6 (from left to right) were concentrated.
