# Supplementary material for: Application of an O-Linked Glycosylation System in Yersinia enterocolitica Serotype O:9 to Generate a New Candidate Vaccine against Brucella abortus
Source: MDPI journal article supplement (doi:10.3390/microorganisms8030436), 2020-03-20
Supplement: s1 [file s1]

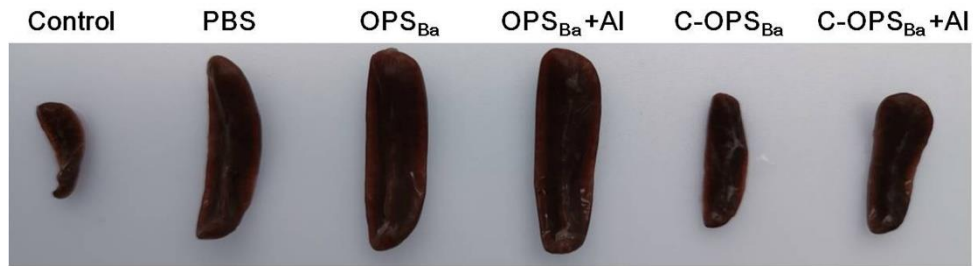

**Figure S4.** Spleen sizes of control (normal) and immunized mice following infection with *B. abortus* A19. On the 10th day following non-lethal A19 challenge, spleens of mice in each group were removed and compared with those of normal mice to observe differences in size and shape.
